# Supplementary material for: Seminal plasma induces inflammation and enhances HIV-1 replication in human cervical tissue explants
Source: PubMed Central journal article supplement (PMC5453613; doi:10.1371/journal.ppat.1006402), 2017-05-19
Supplement: ppat.1006402.s010.pdf [file ppat.1006402.s010.pdf]

| Cytokine                   | Time (h) | CM (n = 7-11) <sup>a</sup>    | CM + indomethacin (n = 7)     |                 |             | SP25% (n = 7)                 |                    |             | SP50% (n = 7-11) <sup>a</sup>  |                    |              | SP50% + indomethacin (n = 7)   |                    |             | SP pool (n = 5)             |
|----------------------------|----------|-------------------------------|-------------------------------|-----------------|-------------|-------------------------------|--------------------|-------------|--------------------------------|--------------------|--------------|--------------------------------|--------------------|-------------|-----------------------------|
|                            |          | Concentration (pg/ml)         | Concentration (pg/ml)         | N-fold (CM)     | p-value     | Concentration (pg/ml)         | N-fold (CM)        | p-value     | Concentration (pg/ml)          | N-fold (CM)        | p-value      | Concentration (pg/ml)          | N-fold (CM)        | p-value     | Concentration (pg/ml)       |
| IL-1 $\alpha$              | 2        | 8.9 [4.0 - 24.2]              | N/A                           | N/A             | N/A         | 11.6 [3.9 - 53.5]             | 1.5 [1.0 - 2.0]    | <b>0.02</b> | 16.3 [8.4 - 28.9]              | 1.0 [0.9 - 3.2]    | 0.62         | N/A                            | N/A                | N/A         | 11.4<br>[8.4 - 23.5]        |
|                            | 4        | 15.6 [4.7 - 45.1]             | 12.7 [6.9 - 27.3]             | 0.9 [0.6 - 2.2] | >0.99       | 18.1 [3.2 - 124.3]            | 1.0 [0.7 - 1.4]    | 0.62        | 19.2 [5.1 - 37.5]              | 1.1 [0.5 - 2.4]    | 0.57         | 14.2 [6.9 - 45]                | 1.3 [0.9 - 2.4]    | 0.31        |                             |
|                            | 12       | 13.6 [6.6 - 24.8]             | 10.4 [6.1 - 15.7]             | 1.0 [0.8 - 1.4] | 0.87        | 30.8 [5.9 - 61.2]             | 1.4 [1.2 - 3.3]    | <b>0.03</b> | 13.9 [7.7 - 59.4]              | 1.5 [0.7 - 3.0]    | 0.07         | 9.3 [4.2 - 17.0]               | 0.9 [0.3 - 1.7]    | 0.78        |                             |
| IL-6                       | 2        | 1513.5<br>[719.9 - 2807.2]    | N/A                           | N/A             | N/A         | 7942.9<br>[3946.4 - 9811.2]   | 5.5 [2.1 - 6.7]    | <b>0.01</b> | 10813.5<br>[5017.7 - 14732.1]  | 5.3 [3.8 - 8.4]    | <b>0.01</b>  | N/A                            | N/A                | N/A         | 78.6<br>[37.2 - 140.7]      |
|                            | 4        | 1521.2<br>[921.9 - 5426.7]    | 1227.5<br>[680.6 - 2052.5]    | 0.7 [0.3 - 1.7] | 0.93        | 11117.2<br>[5923.8 - 13411.3] | 5.1 [3.4 - 6.1]    | <b>0.01</b> | 12132.5<br>[7022.4 - 15630.1]  | 6.0 [3.2 - 8.9]    | <b>0.001</b> | 13912.4<br>[7506.7 - 17237.3]  | 6.6 [3.6 - 18.7]   | <b>0.01</b> |                             |
|                            | 12       | 1309.6<br>[816.9 - 3387.0]    | 1604.0<br>[1276.3 - 3800.1]   | 1.7 [1.1 - 1.9] | <b>0.03</b> | 11245.9<br>[7517.0 - 18600.2] | 6.9 [3.5 - 15.6]   | <b>0.01</b> | 16130.7<br>[10421.2 - 23501.7] | 12.3 [9.0 - 15.7]  | <b>0.001</b> | 13737.3<br>[8283.2 - 15869.0]  | 10.6 [6.8 - 13.9]  | <b>0.01</b> |                             |
| TNF                        | 2        | 5.5 [5.5 - 5.6] <sup>b</sup>  | N/A                           | N/A             | N/A         | 9.9 [6.1 - 13.0]              | 1.8 [1.1 - 2.3]    | <b>0.03</b> | 11.6 [9.1 - 19.7]              | 2.1 [1.7 - 3.6]    | <b>0.01</b>  | N/A                            | N/A                | N/A         | 27.8<br>[25.3 - 71.2]       |
|                            | 4        | 5.5 [5.5 - 6.6] <sup>b</sup>  | 5.5 [5.5 - 7.9] <sup>b</sup>  | 1.0 [0.8 - 1.0] | 0.75        | 12.5 [5.5 - 15.3]             | 1.5 [1.0 - 2.5]    | 0.12        | 18.8 [14.6 - 23.6]             | 2.6 [2.0 - 4.0]    | <b>0.02</b>  | 12.0 [11.1 - 16.6]             | 1.9 [1.1 - 3.0]    | <b>0.03</b> |                             |
|                            | 12       | 5.5 [5.5 - 7.9] <sup>b</sup>  | 5.5 [5.5 - 6.1] <sup>b</sup>  | 1.0 [1.0 - 1.1] | >0.99       | 12.8 [5.8 - 18.8]             | 2.0 [1.1 - 2.8]    | <b>0.03</b> | 19.7 [11.1 - 21.9]             | 2.9 [1.8 - 3.7]    | <b>0.001</b> | 13.4 [11.0 - 24.6]             | 2.4 [1.3 - 4.5]    | <b>0.01</b> |                             |
| CCL5<br>(RANTES)           | 2        | 6.5 [5.5 - 26.8]              | N/A                           | N/A             | N/A         | 28.8 [16.4 - 123.3]           | 3.0 [1.6 - 5.2]    | <b>0.01</b> | 98.1 [11.5 - 228.2]            | 4.6 [2.0 - 17.8]   | <b>0.01</b>  | N/A                            | N/A                | N/A         | 603.6<br>[517.1 - 1492.0]   |
|                            | 4        | 5.5 [5.5 - 7.8] <sup>b</sup>  | 5.5 [5.5 - 10.0] <sup>b</sup> | 1.0 [1.0 - 1.5] | 0.50        | 36.5 [15.2 - 163.0]           | 5.6 [1.8 - 13.8]   | <b>0.03</b> | 86.1 [33.0 - 245.8]            | 11.6 [5.5 - 25.7]  | <b>0.001</b> | 79.9 [46.9 - 153.5]            | 9.7 [5.2 - 19.6]   | <b>0.01</b> |                             |
|                            | 12       | 5.5 [5.5 - 9.1] <sup>b</sup>  | 6.3 [5.5 - 8.7]               | 1.0 [1.0 - 1.2] | 0.62        | 40.7 [17.3 - 140.6]           | 4.5 [3.1 - 5.9]    | <b>0.01</b> | 73.6 [44.2 - 198.4]            | 8.0 [4.0 - 16.0]   | <b>0.001</b> | 83.4 [38.4 - 166.2]            | 8.0 [5.2 - 24.9]   | <b>0.01</b> |                             |
| CCL20<br>(MIP-3 $\alpha$ ) | 2        | 16.9 [10.3 - 19.6]            | N/A                           | N/A             | N/A         | 92.9 [66.3 - 135.3]           | 6.4 [2.6 - 13.1]   | <b>0.01</b> | 107.8 [99.8 - 145.2]           | 9.7 [5.9 - 10.7]   | <b>0.01</b>  | N/A                            | N/A                | N/A         | 555.4<br>[473.1 - 1170.3]   |
|                            | 4        | 10.3 [10.3-36.2] <sup>b</sup> | 10.3 [10.3-10.3] <sup>b</sup> | 1.0 [0.6 - 1.0] | 0.50        | 145.2 [57.3 - 180.4]          | 4.3 [2.8 - 5.3]    | <b>0.01</b> | 134.6 [39.3 - 212.7]           | 3.8 [3.0 - 10.3]   | <b>0.001</b> | 118.0 [91.0 - 152.2]           | 8.8 [2.7 - 14.8]   | <b>0.01</b> |                             |
|                            | 12       | 10.3 [10.3-21.4] <sup>b</sup> | 10.3 [10.3-10.3] <sup>b</sup> | 1.0 [0.7 - 1.0] | 0.34        | 90.9 [68.6 - 152.3]           | 6.7 [1.9 - 6.9]    | <b>0.01</b> | 123.3 [90.8 - 233.3]           | 11.4 [6.8 - 16.1]  | <b>0.002</b> | 91.1 [69.8 - 127.9]            | 8.8 [6.5 - 12.4]   | <b>0.01</b> |                             |
| CXCL1<br>(GRO $\alpha$ )   | 2        | 333.0<br>[268.1 - 363.1]      | N/A                           | N/A             | N/A         | 2227.7<br>[998.1 - 4053.6]    | 5.8 [3.1 - 11.2]   | <b>0.01</b> | 4572.0<br>[3163.2 - 7077.1]    | 11.0 [10.0 - 26.4] | <b>0.01</b>  | N/A                            | N/A                | N/A         | 3595.4<br>[2451.3 - 9487.2] |
|                            | 4        | 475.9<br>[275.9 - 998.3]      | 403.0<br>[283.9 - 958.2]      | 0.6 [0.5 - 1.0] | 0.20        | 3225.0<br>[1821.5 - 3972.9]   | 3.3 [2.1 - 12.6]   | <b>0.01</b> | 3288.1<br>[3140.1 - 6032.3]    | 7.1 [3.2 - 14.0]   | <b>0.001</b> | 3776.1<br>[2680.9 - 5480.7]    | 7.9 [2.7 - 19.6]   | <b>0.01</b> |                             |
|                            | 12       | 631.8<br>[333.8 - 833.6]      | 716.3<br>[562.8 - 1045.3]     | 1.7 [1.4 - 2.7] | <b>0.03</b> | 4375.1<br>[1260.9 - 7720.7]   | 5.8 [3.2 - 12.3]   | <b>0.03</b> | 4993.1<br>[4319.5 - 9953.6]    | 12.5 [6.3 - 13.8]  | <b>0.003</b> | 4600.5<br>[3766.4 - 5981.5]    | 10.1 [6.3 - 17.9]  | <b>0.01</b> |                             |
| CXCL8<br>(IL-8)            | 2        | 835.9<br>[594.3 - 1479.6]     | N/A                           | N/A             | N/A         | 3469.7<br>[1963.8 - 10200.3]  | 5.8 [1.5 - 8.5]    | <b>0.01</b> | 4409.1<br>[2771.5 - 10370.2]   | 5.1 [4.0 - 11.9]   | <b>0.01</b>  | N/A                            | N/A                | N/A         | 3159.1<br>[2035.2 - 5206.7] |
|                            | 4        | 1339.6<br>[738.1 - 2560.3]    | 1019.8<br>[830.1 - 2743.4]    | 0.7 [0.5 - 1.2] | 0.30        | 4804.0<br>[3242.8 - 9812.2]   | 4.3 [2.3 - 7.1]    | <b>0.02</b> | 10200.5<br>[5893.2 - 12635.2]  | 7.6 [3.3 - 13.2]   | <b>0.003</b> | 13840.7<br>[7449.4 - 18475.8]  | 5.6 [3.6 - 16.3]   | <b>0.01</b> |                             |
|                            | 12       | 1412.6<br>[977.6 - 2357.0]    | 2262.8<br>[1496.2 - 3779.6]   | 1.6 [1.1 - 2.0] | <b>0.02</b> | 13488.9<br>[5591.1 - 20000.0] | 5.8 [3.3 - 14.2]   | <b>0.01</b> | 18430.0<br>[11829.8 - 22397.7] | 10.6 [7.9 - 18.8]  | <b>0.001</b> | 16519.7<br>[11240.4 - 21256.6] | 11.7 [5.5 - 21.4]  | <b>0.01</b> |                             |
| TGF- $\beta$ 1             | 2        | 3.4 [3.4 - 3.4] <sup>b</sup>  | N/A                           | N/A             | N/A         | 85.2 [49.6 - 255.4]           | 25.1 [14. - 75.1]  | <b>0.01</b> | 155.8 [87.4 - 280.9]           | 45.8 [25.7 - 82.6] | <b>0.01</b>  | N/A                            | N/A                | N/A         | 602.4<br>[348.8 - 1022.6]   |
|                            | 4        | 3.4 [3.4 - 3.4] <sup>b</sup>  | 3.4 [3.4 - 6.3] <sup>b</sup>  | 1.0 [0.5 - 1.0] | 0.50        | 97.2 [79.5 - 282.7]           | 28.6 [15.0 - 89.8] | <b>0.01</b> | 179.3 [95.7 - 290.6]           | 28.2 [14.1 - 77.9] | <b>0.001</b> | 189.1 [126.3 - 216.4]          | 37.2 [15.0 - 57.9] | <b>0.01</b> |                             |
|                            | 12       | 3.4 [3.4 - 3.4] <sup>b</sup>  | 4.2 [3.4 - 6.8]               | 1.2 [1.0 - 2.0] | 0.12        | 76.1 [68.6 - 142.8]           | 38.8 [22.1 - 42.0] | <b>0.01</b> | 116.7 [57.3 - 205.0]           | 20.3 [15.1 - 60.3] | <b>0.001</b> | 86.7 [55.8 - 173.2]            | 25.5 [16.4 - 50.9] | <b>0.01</b> |                             |
| IL-10                      | 2        | 13.2 [8.5 - 14.2]             | N/A                           | N/A             | N/A         | 14.7 [8.1 - 38.0]             | 1.0 [1.0 - 2.8]    | 0.25        | 10.9 [9.0 - 32.2]              | 1.3 [0.8 - 2.0]    | 0.21         | N/A                            | N/A                | N/A         | 5.4<br>[3.8 - 30.6]         |
|                            | 4        | 13.6 [8.9 - 18.3]             | 14.0 [7.6 - 15.3]             | 0.8 [0.7 - 2.0] | 0.67        | 20.5 [18.7 - 26.5]            | 1.4 [0.9 - 2.0]    | 0.06        | 16.3 [12.6 - 27.3]             | 1.7 [1.0 - 1.9]    | <b>0.01</b>  | 14.2 [11.4 - 18.6]             | 1.1 [0.7 - 1.6]    | 0.56        |                             |
|                            | 12       | 9.7 [4.6 - 12.3]              | 7.2 [5.4 - 13.7]              | 1.3 [1.0 - 1.5] | 0.25        | 12.2 [10.3 - 16.1]            | 1.4 [0.8 - 1.7]    | 0.06        | 14.0 [9.0 - 19.0]              | 1.8 [1.1 - 2.4]    | <b>0.01</b>  | 8.6 [7.7 - 11.1]               | 1.4 [0.8 - 2.0]    | 0.15        |                             |
