# Supplementary material for: Seminal plasma induces inflammation and enhances HIV-1 replication in human cervical tissue explants
Source: PubMed Central journal article supplement (PMC5453613; doi:10.1371/journal.ppat.1006402), 2017-05-19
Supplement: ppat.1006402.s011.pdf [file ppat.1006402.s011.pdf]

| Gene         | Incubation time (h) | CM + indomethacin |             | SP50%            |             | SP50% + indomethacin |             |
|--------------|---------------------|-------------------|-------------|------------------|-------------|----------------------|-------------|
|              |                     | N-fold (CM)       | p-value     | N-fold (CM)      | p-value     | N-fold (CM)          | p-value     |
| <i>IL1A</i>  | 4                   | 1.1 [0.3 - 1.2]   | 0.93        | 4.2 [1.9 - 5.8]  | <b>0.03</b> | 2.6 [1.4 - 5.4]      | <b>0.03</b> |
|              | 12                  | 0.8 [0.5 - 1.1]   | 0.56        | 7.0 [2.7 - 16.9] | <b>0.01</b> | 11.1 [2.4 - 16.1]    | <b>0.01</b> |
| <i>IL6</i>   | 4                   | 0.5 [0.3 - 1.1]   | 0.29        | 2.6 [1.8 - 5.5]  | <b>0.03</b> | 2.4 [2.0 - 4.5]      | <b>0.01</b> |
|              | 12                  | 1.3 [0.4 - 1.9]   | 0.68        | 4.2 [3.5 - 6.4]  | <b>0.01</b> | 1.8 [1.5 - 5.0]      | <b>0.03</b> |
| <i>TNF</i>   | 4                   | 0.7 [0.4 - 1.1]   | 0.20        | 2.9 [1.0 - 5.7]  | 0.06        | 1.4 [0.9 - 2.8]      | 0.12        |
|              | 12                  | 1.2 [0.7 - 1.5]   | 0.55        | 6.1 [3.4 - 17.1] | <b>0.03</b> | 10.2 [3.1 - 19.8]    | <b>0.01</b> |
| <i>CCL5</i>  | 4                   | 0.7 [0.6 - 0.9]   | <b>0.03</b> | 0.5 [0.3 - 0.6]  | 0.27        | 0.6 [0.3 - 0.8]      | 0.15        |
|              | 12                  | 0.9 [0.6 - 1.7]   | 1.00        | 1.0 [0.6 - 1.7]  | 0.84        | 0.9 [0.7 - 1.6]      | 0.80        |
| <i>CCL20</i> | 4                   | 0.5 [0.3 - 0.9]   | <b>0.04</b> | 4.5 [1.7 - 19.2] | <b>0.01</b> | 5.6 [2.2 - 10.6]     | <b>0.01</b> |
|              | 12                  | 0.6 [0.3 - 2.6]   | 0.93        | 4.2 [7.2 - 18.9] | <b>0.01</b> | 10.3 [1.9 - 14.9]    | <b>0.01</b> |
| <i>CXCL1</i> | 4                   | 0.5 [0.3 - 1.0]   | 0.10        | 1.3 [0.6 - 2.2]  | 0.35        | 1.4 [1.1 - 3.0]      | 0.07        |
|              | 12                  | 2.0 [0.7 - 3.6]   | 0.11        | 4.6 [2.3 - 7.6]  | <b>0.01</b> | 4.7 [1.8 - 8.0]      | <b>0.03</b> |
| <i>CXCL8</i> | 4                   | 0.7 [0.4 - 1.1]   | 0.20        | 1.7 [1.1 - 4.4]  | <b>0.01</b> | 1.8 [1.4 - 3.7]      | <b>0.01</b> |
|              | 12                  | 1.4 [0.6 - 2.2]   | 0.23        | 5.3 [3.1 - 9.6]  | <b>0.01</b> | 4.6 [2.5 - 17.3]     | <b>0.01</b> |
| <i>TGFB1</i> | 4                   | 1.3 [0.9 - 1.9]   | 0.17        | 0.5 [0.4 - 1.1]  | 0.14        | 0.7 [0.2 - 0.8]      | <b>0.03</b> |
|              | 12                  | 1.0 [0.6 - 1.3]   | 0.83        | 0.4 [0.3 - 1.0]  | 0.40        | 0.6 [0.4 - 0.9]      | 0.12        |
| <i>IL10</i>  | 4                   | 0.7 [0.6 - 0.8]   | <b>0.02</b> | 0.6 [0.4 - 0.8]  | 0.05        | 0.6 [0.4 - 0.8]      | <b>0.02</b> |
|              | 12                  | 0.8 [0.6 - 1.3]   | 0.55        | 1.1 [0.5 - 1.5]  | 0.67        | 0.8 [0.6 - 1.2]      | 0.46        |
| <i>CSF2</i>  | 4                   | 0.9 [0.3 - 1.3]   | 0.55        | 1.5 [1.0 - 5.0]  | 0.18        | 1.4 [0.9 - 1.6]      | 0.23        |
|              | 12                  | 0.9 [0.3 - 1.8]   | 0.86        | 2.7 [1.5 - 7.3]  | <b>0.03</b> | 3.3 [1.9 - 9.8]      | <b>0.03</b> |
| <i>IL7</i>   | 4                   | 0.7 [0.6 - 0.9]   | 0.05        | 2.4 [1.0 - 3.7]  | 0.06        | 1.6 [0.8 - 3.8]      | 0.15        |
|              | 12                  | 0.9 [0.7 - 1.4]   | 0.80        | 8.5 [4.0 - 36.7] | <b>0.01</b> | 15.2 [2.6 - 35.1]    | <b>0.01</b> |
| <i>PTGS2</i> | 4                   | 0.6 [0.4 - 0.8]   | 0.08        | 1.7 [1.1 - 1.9]  | 0.06        | 1.3 [1.1 - 1.7]      | <b>0.03</b> |
|              | 12                  | 1.5 [0.4 - 1.6]   | 0.66        | 2.7 [1.6 - 4.1]  | <b>0.02</b> | 2.3 [2.2 - 4.0]      | <b>0.03</b> |
